# Supplementary material
Source: PubMed Central journal article supplement (PMC3734664)
Supplement: mt2013118x1.pdf [file mt2013118x1.pdf]

## Supplementary Figure S1

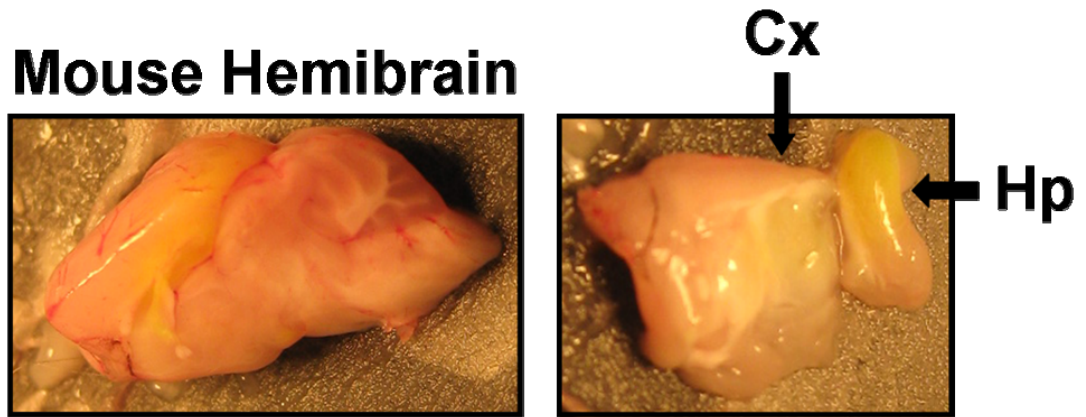

Fig. S1. Macroscopic GFP expression in adult mouse brain, 1 month after brain injection with 1.0 ul of AAV solution in the dorsal hippocampus. Left panel: intact mouse hemibrain viewed facing the midline of the brain with the cerebellum on the right side of the image. Right panel: mouse hemibrain with hippocampus dissected out and reflected away from the cortex. Cx – cortex; Hp – hippocampus.

## Supplementary Figure S2

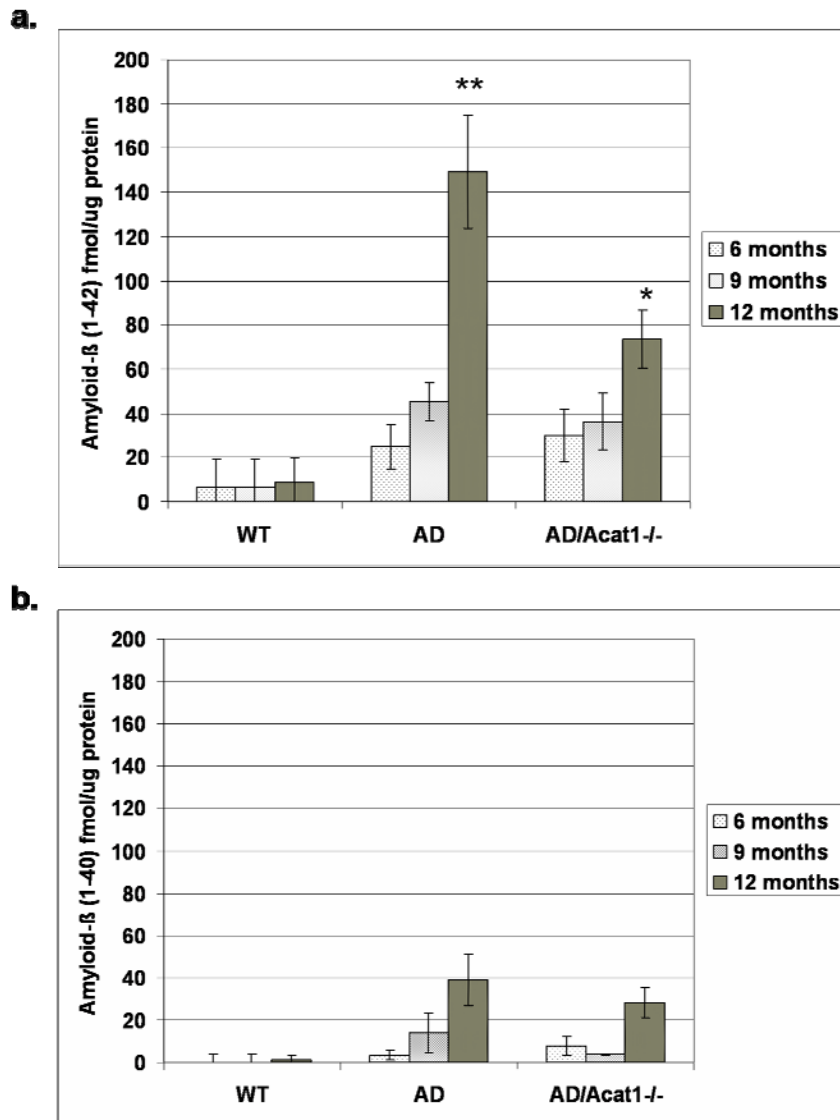

Fig. S2. Temporal characterization of A $\beta$  pathology in 3xTg-AD mice used in this study. Brain homogenates from AD or AD/Acat1<sup>-/-</sup> mice that were 6, 9, or 12 months of age were used for all of the experiments shown in this figure. (a) ELISA assay of A $\beta$ 42 in formic acid extracts of mouse brain homogenates. The samples from each group (6 – 8 mice per group) were pooled and ELISA assay was performed twice in triplicate for each group's pooled sample. Error bars represent mean  $\pm$  SEM. The difference between 9- and 12-month-old AD mice is statistically significant (\*\*;  $p < 0.002$ ). The difference between 9- and 12-month-old AD/Acat1<sup>-/-</sup> mice is statistically significant (\*;  $p < 0.02$ ). (b) Same as described in a, but ELISA assay is for A $\beta$ 40. The difference between 9- and 12-month-old AD mice is trending toward statistical significance ( $p = 0.1$ ). The difference between 9- and 12-month-old AD/Acat1<sup>-/-</sup> mice is statistically significant ( $p < 0.05$ )

## Supplementary Figure S3

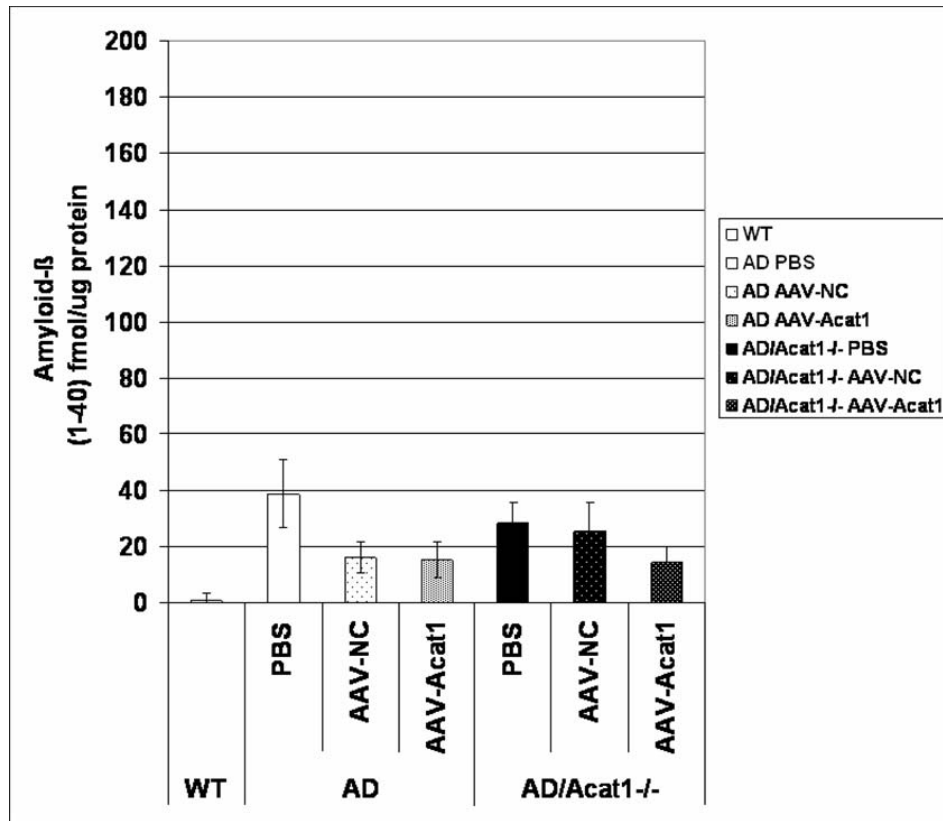

Fig. S3. Amyloid- $\beta$  (1-40) (A $\beta$ 40) ELISA assay in brain homogenates from brain injected mice. Sample pools of mouse brain homogenates in sucrose buffer were subjected to formic acid extraction. The neutralized extracts were assayed for A $\beta$ 40 by ELISA. Formic acid extraction followed by ELISA was performed N=3 separate times on different sample pools; each time the ELISA assay was run in duplicate or triplicate for each sample. Error bars represent mean  $\pm$  SEM. ANOVA analysis showed that there was not a significant difference among the means.

## Supplementary Table S1

| <u>Name of miRNA</u>    | <u>Sequence</u>                                                                                              | <u>Incorporated into AAV?</u> | <u>AAV name</u>               |
|-------------------------|--------------------------------------------------------------------------------------------------------------|-------------------------------|-------------------------------|
| <b>Negative Control</b> | <b>5'-<u>GAAATGTACTGCGCGTGGA</u><br/><u>GACGTTTTGGCCACTGACTGA</u><br/><u>CGTCTCCACGCAGTACATTT</u>-3'</b>     | Yes                           | AAV-NC                        |
| Soat1 #52               | 5'-TGCTGTGATGTGGTCCACTTC<br><u>AAACAGTTTTGGCCACTGACTG</u><br>ACTGTTTGAAGGACCACATCA-3'                        | No                            | -                             |
| Soat1 #53               | 5'-TGCTGATAAATAGTGGCTTCA<br><u>GCTCCGTTTTGGCCACTGACTGA</u><br>CGGAGCTGACCACTATTTAT-3'                        | No                            | -                             |
| <b>Soat1 #54</b>        | <b>5'-TGCTGT<u>CCAGTATCAGAATG</u><br/><u>AACCGGGTTTTGGCCACTGACT</u><br/><u>GACCCGGTTC</u>ACTGATACTGGA-3'</b> | Yes                           | AAV-Acat1(54)<br>or AAV-Acat1 |
| <b>Soat1 #55</b>        | <b>5'-TGCTGT<u>ACAGTAGGAGTCCTT</u><br/><u>GGGTAGTTTTGGCCACTGACTG</u><br/><u>ACTACCCAAGCTCCT</u>ACTGTA-3'</b> | Yes                           | AAV-Acat1(55)<br>or AAV-Acat1 |

Table S1. Sequences of artificial microRNAs. Sequence is as indicated with the targeting region underlined. Negative Control, Soat1 #54 and Soat1 #55 miRNAs were incorporated into AAV constructs from which viruses used in this study were produced. The names of the AAVs are indicated.

## Supplementary Table S2

| <b>Gene</b>                          | <b>Primer Sequences</b>                                            |
|--------------------------------------|--------------------------------------------------------------------|
| <b><i>Iba1</i></b>                   | 5'-GGACAGACTGCCAGCCTAAG -3'<br>5'-CAGCTCTAGGTGGGTCTTGG -3'         |
| <b><i>GFAP</i></b>                   | 5'-ATTGCTGGAGGGCGAAGAA-3'<br>5'-CGGATCTGGAGGTTGGAGAA-3             |
| <b><i>TNF<math>\alpha</math></i></b> | 5'-TCTCATCAGTTCTATGGCCC-3'<br>5'-GGGAGTAGACAAGGTACAAC-3'           |
| <b><i>iNOS</i></b>                   | 5'-AAGCTGCATGTGACATCGAC-3'<br>5'-ATGTGTCTGCAGATGTGCTG-3'           |
| <b><i>Acat2</i></b>                  | 5'-TTTGCTCTATGCCTGCTTCA-3'<br>5'-CCATGAAGAGAAAGGTCCACA-3'          |
| <b><i>HPRT (loading control)</i></b> | 5'-CCAGGTTATGACCTAGATTTGTTTT-3'<br>5'- TTTCCAGTTAAAGTTGAGAGATCA-3' |

Table S2. Primers used for Real Time PCR.
